# Supplementary material
Source: Elsevier journal article supplement (https://www.sciencedirect.com/science/article/pii/S2173574321002203)
Supplement: mmc1 [file S2173574321002203:mmc1.pdf]

# DESTINO REMISIÓN (ENCUESTA)

## 1 Analizar la situación actual

1. ¿Qué es para ti el concepto de remisión? (Elige la que más se acerca a lo que tú consideras remisión)
  - a. Curación
  - b. Ausencia de síntomas
  - c. Inflamación mínima o ausente
  - d. Ausencia de inflamación y de síntomas
2. ¿Crees que en el concepto de remisión se debe incluir el resultado de...

|                                                                                                       |                             |                             |
|-------------------------------------------------------------------------------------------------------|-----------------------------|-----------------------------|
| Imagen                                                                                                | <input type="checkbox"/> Sí | <input type="checkbox"/> No |
| Variables declaradas por el paciente (PRO: Patient Reported Outcomes)                                 | <input type="checkbox"/> Sí | <input type="checkbox"/> No |
| Seroconversión (Negativización de FR y ACPA)                                                          | <input type="checkbox"/> Sí | <input type="checkbox"/> No |
| Biomarcadores (por ejemplo: reactantes de fase aguda, calprotectina, marcadores biológicos múltiples) | <input type="checkbox"/> Sí | <input type="checkbox"/> No |

3. ¿En tu práctica clínica cómo valoras la remisión en tus pacientes? (Indica el % de uso de cada una de estas herramientas)

% de pacientes en los que valoras la remisión en función de... (Likert 5)

|                          | 0 – 5% | 5 – 25% | 25 – 50% | 50 – 75% | 75-100% |
|--------------------------|--------|---------|----------|----------|---------|
| DAS28                    |        |         |          |          |         |
| SDAI                     |        |         |          |          |         |
| CDAI                     |        |         |          |          |         |
| Recuento dolorosas       |        |         |          |          |         |
| Recuento tumefactas      |        |         |          |          |         |
| Reactantes de fase aguda |        |         |          |          |         |
| Valoración del médico    |        |         |          |          |         |
| Valoración del paciente  |        |         |          |          |         |
| RAPID-3                  |        |         |          |          |         |
| Ecografía                |        |         |          |          |         |
| Radiografía              |        |         |          |          |         |
| RM                       |        |         |          |          |         |

4. ¿Cuál es tu **objetivo terapéutico**?
  - a. Remisión
  - b. Remisión o baja actividad, dependiendo de los casos
  - c. Baja actividad
5. ¿**Reduces** la dosis de terapia biológica una vez alcanzado el **objetivo terapéutico**?
  - a. Siempre
  - b. Habitualmente
  - c. Sólo en determinados perfiles de pacientes
  - d. Nunca

6. ¿Cuánto tiempo mantienes a tus pacientes habitualmente en objetivo terapéutico antes de disminuir la dosis de terapia biológica?
- Nunca me lo planteo
  - 12 meses o más en objetivo terapéutico
  - Entre 6 y 12 meses en objetivo terapéutico
  - Menos de 6 meses en objetivo terapéutico
7. Imagina un paciente que está en objetivo terapéutico en el que te plantearas reducir dosis de terapia biológica ¿Qué valor darías a cada uno de los siguientes escenarios para tomar la decisión?

|                                                                     | 1<br>(no le doy valor) | 2 | 3 | 4 | 5<br>(le doy mucho valor) |
|---------------------------------------------------------------------|------------------------|---|---|---|---------------------------|
| a. El paciente está con corticoides a dosis bajas                   |                        |   |   |   |                           |
| b. El EVA del paciente es 0, independientemente de otros parámetros |                        |   |   |   |                           |
| c. La ecografía muestra señal Doppler                               |                        |   |   |   |                           |
| d. Es una AR con factores de mal pronóstico                         |                        |   |   |   |                           |
| e. No lleva FAME asociado                                           |                        |   |   |   |                           |
| f. Ha fallado a varios biológicos previos                           |                        |   |   |   |                           |
| g. Cuando empezó el biológico tenía actividad alta                  |                        |   |   |   |                           |
| h. Duración de la enfermedad <1-2 años                              |                        |   |   |   |                           |
| i. Edad ≥ 70 años                                                   |                        |   |   |   |                           |

8. ¿Utilizas los niveles de fármaco para tomar la decisión de reducir dosis de biológico?
- Habitualmente
  - Algunas veces
  - Nunca, porque no creo en ellos
  - Nunca, porque no dispongo de ellos
9. ¿Utilizas la ecografía para tomar la decisión de reducir dosis de biológico?
- Habitualmente
  - Algunas veces
  - Nunca, porque no creo en ella
  - Nunca, porque no dispongo de ecógrafo
10. ¿Conoces la herramienta RedoSER disponible en la página de la SER?
- No → Continúa a pregunta 12
  - Sí
11. ¿La utilizas?
- Siempre
  - Alguna vez
  - No

12. ¿Qué te motiva, o motivaría, para reducir la dosis de la terapia biológica?

|                                                                                                 | (Totalmente en contra)<br>1 | 2 | 3 | 4 | (Totalmente de acuerdo)<br>5 |
|-------------------------------------------------------------------------------------------------|-----------------------------|---|---|---|------------------------------|
| a. Mejorar la seguridad                                                                         |                             |   |   |   |                              |
| b. La posibilidad de ahorrar                                                                    |                             |   |   |   |                              |
| c. El hecho de que se puede recuperar el objetivo terapéutico subiendo dosis en caso de rebrote |                             |   |   |   |                              |
| d. El hecho de que las guías clínicas lo contemplan                                             |                             |   |   |   |                              |
| e. Que así lo dicte el protocolo de mi centro / CCAA                                            |                             |   |   |   |                              |
| f. Que me lo solicite el paciente                                                               |                             |   |   |   |                              |
| g. Utilizar la mínima dosis eficaz                                                              |                             |   |   |   |                              |

## Preguntas conocimientos

1. ¿Qué es la **remisión clínica**? Marque la que según su opinión se ajusta más
- a. Ausencia de signos y síntomas de actividad inflamatoria significativa
  - b. Mejoría de más de un 80% respecto de la situación basal del paciente
  - c. Normalización de los reactantes de fase aguda
  - d. DAS28-VSG <3.2
  - e. Exploración física normal, sin hallazgos que sugieran datos de actividad

Respuesta: La a) es la definición de remisión clínica. B) no es adecuada, para definir remisión no deben existir signos ni síntomas de enfermedad, no sólo un determinado porcentaje de mejoría desde la basal. C) no es correcta, ya que no sólo se fundamenta la remisión en parámetros de laboratorio. D) la definición de remisión según el DAS28-VSG debe ser menor de 2.6. E) Además de una exploración física normal, la remisión significa que no hay signos ni síntomas de actividad significativa.

2. Señala la opción más acertada respecto a la **remisión mantenida según EULAR**
- a. Conseguir DAS 28-VSG <2,6 durante 3 meses
  - b. Al menos 6 meses en remisión
  - c. Conseguir datos de mínima actividad, sin tratamiento
  - d. Conseguir baja actividad sin necesidad de corticoides
  - e. NAT y NAD igual a 0, en dos visitas consecutivas

Respuesta: A) No es correcto. DAS 28-VSG <2,6 durante 3 meses es remisión, pero para ser mantenida, debería estar en remisión en 2 evaluaciones clínicas consecutivas separadas en el tiempo. B) Correcto. En la última actualización de las recomendaciones Eular para el tratamiento de la AR, se habla de remisión sostenida o mantenida a partir de 6 meses. C) No es correcto. EULAR habla de remisión en función de la actividad, no del tratamiento que esté utilizando el paciente en ese momento. D) No es correcto. Ningún tratamiento aparece en la definición de remisión por EULAR. E) No es correcto. La ausencia de signos y síntomas de actividad debe darse en dos evaluaciones clínicas consecutivas, pero además tienen que estar separadas al menos 3 meses.

3. ¿En qué pacientes es más frecuente la **remisión mantenida**?
- a. En los que se puede retirar los corticoides en menos de 3 meses
  - b. En los que tienen ACPA positivo
  - c. En los que inician terapia con FAME antes de 1 año de síntomas
  - d. Con más de 5 articulaciones tumefactas al debut
  - e. Con fracaso a dos terapias dirigidas

Respuesta: A) No es correcto. Salvo en situaciones de corticoidependencia, no parece que existan diferencias entre retirar los corticoides en menos de 3 meses o menos de 6. B) No es correcto. La remisión en general es menos probable en pacientes ACPA (+). C) Correcto. Cuanto antes se inicie la terapia con FAME, mayor la probabilidad de entrar en remisión y de que esta sea prolongada. D) No es correcto. Al contrario, la remisión mantenida es más frecuente si existe una baja actividad al debut. E) No es correcto. La necesidad de varios tratamientos de terapias dirigidas, se asocia a baja probabilidad de lograr remisión.

4. ¿Qué índice no incluye valor de laboratorio?
- a. DAS28-VSG
  - b. DAS28-PCR
  - c. SDAI
  - d. CDAI
  - e. DAS28

Respuesta: A) No es correcto. Incluye la VSG. B) No es correcto. Incluye la PCR. C) Incluye la PCR. D) Correcto. No incluye ningún dato de laboratorio. E) No es correcto. Incluye la VSG

5. Sólo uno de los siguientes es un punto de corte aceptado para remisión
- a. DAS 28-VSG < 3,2
  - b. DAS 28-PCR > 3,2
  - c. DAS 28-VSG < 2,6
  - d. SDAI < 3,6

e. CDAI <3,3

Respuesta: A) No es correcto. El punto de corte de remisión del DAS 28-VSG es 2,6. B) No es correcto. El punto de corte de remisión del DAS 28-PCR es 2,6. C) Correcto. Este es el punto de remisión del DAS28 con VSG D) No es correcto. El punto de corte de remisión del SDAI es 3,3. E) No es correcto. El punto de corte de remisión del CDAI es 2,8.

6. ¿Se pueden intercambiar DAS28-PCR y DAS28-VSG, utilizando en uno la PCR y en otro la VSG?

- a. Sí, se pueden intercambiar, ya que para ambos la remisión está en 2,6
- b. No, en general el DAS28-PCR da menor puntuación que el DAS28-VSG
- c. No, dado que el punto de corte del DAS28-PCR es más alto que el DAS 28-VSG
- d. No, el DAS28-PCR sólo se puede intercambiar por el SDAI
- e. Sí, el DAS 28 VSG y el DAS 28 PCR son intercambiables en situaciones de baja actividad de la enfermedad

Respuesta: A) No es correcto. El DAS28-PCR puede infraestimar la actividad de la enfermedad si utilizamos los puntos de corte del DAS28-VSG. B) Correcto. Los puntos de corte para el DAS28-PCR son más bajos que los descritos para el DAS 28-VSG. C) No es correcto. El punto de corte del DAS 28-PCR es más bajo que el del DAS 28. D) No es correcto. Según el criterio de remisión que se escoja, los resultados serán diferentes. E) No es correcto. El DAS28-VSG y el DAS28-PCR no son intercambiables.

7. Los criterios EULAR/ACR de remisión de 2011 incluyen criterios booleanos y basados en índices. Señala cuál es la "pareja" verdadera (tipo de criterio e ítem incluido)

- a. booleanos – EVA médico  $\leq 1$
- b. booleanos – VSG  $\leq 10$
- c. basados en índice – DAS 28-VSG <2,8
- d. booleanos – EVA paciente  $\leq 1$
- e. basados en índice – CDAI < 3,2

Respuesta: A) No es correcto. Los criterios booleanos no incluyen la EVA del médico. B) No es correcto. Los criterios booleanos no incluyen la VSG. C) No es correcto. Los criterios de remisión basados en índice utilizan el CDAI, no el DAS28. D) Es la correcta. E) No es correcto. El criterio basado en índice es el CDAI, pero cuando es menor o igual de 2,8.

8. ¿Cuál de las siguientes **NO** es una ventaja de usar un PRO para evaluar la remisión?

- a. Permiten que se establezca una relación médico-paciente fluida
- b. Precisa de tiempos de consulta más largos
- c. Facilitan la participación del paciente en decisiones de tratamiento compartidas
- d. Sientan las bases del autocuidado
- e. Al ser siempre el paciente quien lo rellena, no hay cambios en la perspectiva, como si ocurriría si cambiara el médico

Respuesta: A) No es correcto. Los PRO facilitan la relación médico-paciente, luego es una ventaja. B) Correcto. En realidad los PRO no tienen por qué alargar la consulta; el paciente los puede responder antes de entrar. C) No es correcto. El uso de PRO facilita la participación del paciente en la toma de decisiones, luego es una ventaja. D) No es correcto. Los PRO favorecen el autocuidado, luego es una ventaja. E) No es correcto. En los PRO, sólo hay un observador, el paciente, por lo que los datos son más reproducibles que con dos observadores, luego es una ventaja.

9. ¿Qué definición práctica de remisión se asocia a ausencia de progresión radiológica?

- a. Remisión ecográfica y booleana
- b. Presencia de sinovitis ecográfica pero no clínica
- c. DAS28-VSG <2,8
- d. Sinovitis residual
- e. Señal Power-Doppler en contacto con el hueso

Respuesta: A) Correcto. La remisión por ecografía y según criterios booleanos es la que más se ha asociado a ausencia de progresión radiológica. B) No es correcto. La presencia de sinovitis ecográfica se asocia a

progresión. C) No es correcto. La definición de remisión del DAS28-VSG es  $<2.6$ . D) No es correcto. La sinovitis residual es sinovitis ecográfica y se asocia a progresión. E) No es correcto. La señal PD en contacto o penetrando en el hueso tiene elevado riesgo de progresión.

10. Una vez alcanzada la remisión: ¿Qué dicen las guías internacionales?

- a. ACR: interrumpir todos los tratamientos a los 2 meses de conseguir la remisión
- b. ACR: no se debe reducir la dosis, sino suspender tratamientos, en función de la actividad
- c. EULAR: suspender primero el fármaco sintético y, por último, los glucocorticoides
- d. EULAR: comenzar reduciendo la dosis de los glucocorticoides
- e. EULAR: suspender primero el fármaco biológico

Respuesta: A) No es correcto. El ACR recomienda NO interrumpir todos los tratamientos para la AR. B) No es correcto. El ACR establece que, en remisión, se puede considerar la reducción de dosis de los tratamientos para la AR. C) No es correcto. EULAR recomienda empezar primero la reducción de corticoides y por último los FAME sintéticos. D) Es la correcta. EULAR recomienda comenzar a reducir dosis por los corticoides. E) No es correcto. EULAR recomienda primero reducir dosis de corticoides, después biológicos y después los FAME sintéticos.

11. Respecto a la sinovitis detectada por ecografía, señale la respuesta correcta:

- a. No es predictor de fallo a reducción de dosis
- b. Tiene más probabilidades de tener un brote
- c. Si hay remisión clínica, pierde su capacidad predictora de daño articular
- d. La muñeca y MCF incluidas en los índices son siempre de la mano no dominante
- e. Se asocia a mayor duración de la remisión clínica

Respuesta: A) No es correcto. La sinovitis detectada por ecografía predice el fallo tras reducción de dosis. B) Es correcto. Su presencia debería tenerse en cuenta a la hora de optimizar. C) No es correcto. La sinovitis detectada por ecografía predice progresión, independientemente de la clínica. D) No es correcto. Son las de la mano dominante las que están incluidas en todos los índices. E) No es correcto. La sinovitis detectada por ecografía se asocia a menor duración de la remisión tras reducción de dosis.

12. Señala la **correcta** en relación con el **MBDA** (*Multi- Blomaker Disease Activity test*)

- a. Ha sido validado en estudios clínicos de pacientes con AR precoz y establecida
- b. No se correlaciona con medidas clínicas de actividad, sólo con medidas ecográficas
- c. Está formado exclusivamente por PCR y VSG
- d. Está ampliamente validado y extendido en su uso
- e. La mejoría temprana en la puntuación del MBDA no se asocia a remisión clínica al año

Respuesta A) Es la correcta. B) No es correcto. Se ha demostrado que se correlaciona significativamente con las medidas clínicas de actividad. C) No es correcto. Está formado por PCR, amiloide A, IL-6, TNF-R1, Leptina, Resistina, MMP-1, MMP-3, YKL-40, VCAM-1, VEGF-A y EGF. D) No es correcto. El MBDA ha demostrado una moderada validez convergente con el DAS28-PCR y DAS28-VSG, pero correlaciones más débiles con SDAI, CDAI y RAPID. Son necesarios más estudios para valorar las características de su comportamiento. E) No es correcto. Una mejoría temprana en la puntuación del MBDA se asocia a remisión clínica a 1 año.

13. Marque la **correcta** respecto a la **calprotectina**

- a. No se ha estudiado su utilidad en la AR todavía
- b. Es un predictor muy potente de recaída en pacientes en remisión / baja actividad con terapia anti-TNF
- c. Predice la respuesta a la reducción de dosis con anti-TNF
- d. No existe asociación entre los niveles de calprotectina y los índices de actividad
- e. Sus niveles no se asocian con la sinovitis subclínica ecográfica

Respuesta: A) No es correcto. Aunque se necesitan más trabajos de calprotectina en AR, sus posibles utilidades han sido estudiadas ampliamente. B) Es la respuesta correcta. C) No es correcto. En pacientes con baja actividad de la enfermedad, la calprotectina no tiene valor predictivo tras la disminución del tratamiento con anti TNF. D) No es correcto. Sí existe asociación entre los niveles del calprotectina y los

índices de actividad. E) No es correcto. Los niveles de calprotectina sí se asocian con la sinovitis subclínica ecográfica.

14. ¿Qué es la calculadora REDOSER?

- a. Es un nuevo proyecto SER de control de dosis de biológicos
- b. Es una calculadora para pacientes, para conocer su situación clínica
- c. Es una aplicación diseñada para ayudarle en la toma de decisiones relacionadas con la reducción de dosis de terapia biológica, para profesionales
- d. Es una herramienta que ayuda a calcular el precio de los tratamientos de los pacientes con AR
- e. Es una aplicación que permite ajustar la dosis de corticoides y biológicos, según los datos ecográficos

Respuesta: A) No es correcto. Es un proyecto SER finalizado para la valoración de la reducción de dosis. B) No es correcto. Es una herramienta para profesionales. C) Es la correcta, Redoser ayuda a la toma de decisiones en el ámbito profesional. D) No es correcto. Es una herramienta para la toma de decisiones de reducción de dosis, no para el cálculo de precios. E) No es correcto. No es para el ajuste de dosis, es para tomar la decisión si reducir o no.

## Evaluación de conocimientos sobre la remisión

### 1. ¿Qué es la remisión clínica? Marque la que según su opinión se ajusta más

- a. Ausencia de signos y síntomas de actividad inflamatoria significativa
- b. Mejoría de más de un 80% respecto de la situación basal del paciente
- c. Normalización de los reactantes de fase aguda
- d. DAS28-VSG <3.2
- e. Exploración física normal, sin hallazgos que sugieran datos de actividad

Respuesta: La a) es la definición de remisión clínica. B) no es adecuada, para definir remisión no deben existir signos ni síntomas de enfermedad, no sólo un determinado porcentaje de mejoría desde la basal. C) no es correcta, ya que no sólo se fundamenta la remisión en parámetros de laboratorio. D) la definición de remisión según el DAS28-VSG debe ser menor de 2.6. E) Además de una exploración física normal, la remisión significa que no hay signos ni síntomas de actividad significativa.

|                  |    |
|------------------|----|
| % correctas pre  | 78 |
| % correctas post | 90 |
| Mejoría          | 12 |

### 2. Señala la opción más acertada respecto a la remisión mantenida según EULAR

- a. Conseguir DAS 28-VSG <2,6 durante 3 meses
- b. Al menos 6 meses en remisión
- c. Conseguir datos de mínima actividad, sin tratamiento
- d. Conseguir baja actividad sin necesidad de corticoides
- e. NAT y NAD igual a 0, en dos visitas consecutivas

Respuesta: A) No es correcto. DAS 28-VSG <2,6 durante 3 meses es remisión, pero para ser mantenida, debería estar en remisión en 2 evaluaciones clínicas consecutivas separadas en el tiempo. B) Correcto. En la última actualización de las recomendaciones Eular para el tratamiento de la AR, se habla de remisión sostenida o mantenida a partir de 6 meses. C) No es correcto. EULAR habla de remisión en función de la actividad, no del tratamiento que esté utilizando el paciente en ese momento. D) No es correcto. Ningún tratamiento aparece en la definición de remisión por EULAR. E) No es correcto. La ausencia de signos y síntomas de actividad debe darse en dos evaluaciones clínicas consecutivas, pero además tienen que estar separadas al menos 3 meses.

|                  |    |
|------------------|----|
| % correctas pre  | 58 |
| % correctas post | 61 |
| Mejoría          | 3  |

### 4. ¿En qué pacientes es más frecuente la remisión mantenida?

- a. En los que se puede retirar los corticoides en menos de 3 meses
- b. En los que tienen ACPA positivo
- c. En los que inician terapia con FAME antes de 1 año de síntomas
- d. Con más de 5 articulaciones tumefactas al debut
- e. Con fracaso a dos terapias dirigidas

Respuesta: A) No es correcto. Salvo en situaciones de corticoidependencia, no parece que existan diferencias entre retirar los corticoides en menos de 3 meses o menos de 6. B) No es correcto. La remisión en general es menos probable en pacientes ACPA (+). C) Correcto. Cuanto antes se inicie la terapia con FAME, mayor la probabilidad de entrar en remisión y de que esta sea prolongada. D) No es correcto. Al contrario, la remisión mantenida es más frecuente si existe una baja actividad al debut. E) No es correcto. La necesidad de varios tratamientos de terapias dirigidas, se asocia a baja probabilidad de lograr remisión.

|                 |    |
|-----------------|----|
| % correctas pre | 79 |
|-----------------|----|



|                         |    |
|-------------------------|----|
| <b>% correctas post</b> | 78 |
| <b>Mejoría</b>          | -1 |

## 5. ¿Qué índice no incluye valor de laboratorio?

- DAS28-VSG
- DAS28-PCR
- SDAI
- CDAI
- DAS28

Respuesta: A) No es correcto. Incluye la VSG. B) No es correcto. Incluye la PCR. C) Incluye la PCR. D) Correcto. No incluye ningún dato de laboratorio. E) No es correcto. Incluye la VSG

|                         |    |
|-------------------------|----|
| <b>% correctas pre</b>  | 77 |
| <b>% correctas post</b> | 94 |
| <b>Mejoría</b>          | 17 |

## 6. Sólo uno de los siguientes es un punto de corte aceptado para remisión

- DAS 28-VSG < 3,2
- DAS 28-PCR > 3,2
- DAS 28-VSG < 2,6
- SDAI < 3,6
- CDAI < 3,3

Respuesta: A) No es correcto. El punto de corte de remisión del DAS 28-VSG es 2,6. B) No es correcto. El punto de corte de remisión del DAS 28-PCR es 2,6. C) Correcto. Este es el punto de remisión del DAS28 con VSG D) No es correcto. El punto de corte de remisión del SDAI es 3,3. E) No es correcto. El punto de corte de remisión del CDAI es 2,8.

|                         |    |
|-------------------------|----|
| <b>% correctas pre</b>  | 92 |
| <b>% correctas post</b> | 84 |
| <b>Mejoría</b>          | -8 |

## 7. ¿Se pueden intercambiar DAS28-PCR y DAS28-VSG, utilizando en uno la PCR y en otro la VSG?

- Sí, se pueden intercambiar, ya que para ambos la remisión está en 2,6
- No, en general el DAS28-PCR da menor puntuación que el DAS28-VSG
- No, dado que el punto de corte del DAS28-PCR es más alto que el DAS 28-VSG
- No, el DAS28-PCR sólo se puede intercambiar por el SDAI
- Sí, el DAS 28 VSG y el DAS 28 PCR son intercambiables en situaciones de baja actividad de la enfermedad

Respuesta: A) No es correcto. El DAS28-PCR puede infraestimar la actividad de la enfermedad si utilizamos los puntos de corte del DAS28-VSG. B) Correcto. Los puntos de corte para el DAS28-PCR son más bajos que los descritos para el DAS 28-VSG. C) No es correcto. El punto de corte del DAS 28-PCR es más bajo que el del DAS 28. D) No es correcto. Según el criterio de remisión que se escoja, los resultados serán diferentes. E) No es correcto. El DAS28-VSG y el DAS28-PCR no son intercambiables.

|                         |    |
|-------------------------|----|
| <b>% correctas pre</b>  | 40 |
| <b>% correctas post</b> | 41 |
| <b>Mejoría</b>          | 1  |

8. Los criterios EULAR/ACR de remisión de 2011 incluyen criterios booleanos y basados en índices. Señala cuál es la “pareja” verdadera (tipo de criterio e ítem incluido)

- booleanos – EVA médico  $\leq 1$
- booleanos – VSG  $\leq 10$
- basados en índice – DAS 28-VSG  $< 2,8$
- booleanos – EVA paciente  $\leq 1$
- basados en índice – CDAI  $< 3,2$

Respuesta: A) No es correcto. Los criterios booleanos no incluyen la EVA del médico. B) No es correcto. Los criterios booleanos no incluyen la VSG. C) No es correcto. Los criterios de remisión basados en índice utilizan el CDAI, no el DAS28. D) Es la correcta. E) No es correcto. El criterio basado en índice es el CDAI, pero cuando es menor o igual de 2,8.

|                  |    |
|------------------|----|
| % correctas pre  | 49 |
| % correctas post | 60 |
| Mejoría          | 11 |

9. ¿Cuál de las siguientes NO es una ventaja de usar un PRO para evaluar la remisión?

- Permiten que se establezca una relación médico-paciente fluida
- Precisa de tiempos de consulta más largos
- Facilitan la participación del paciente en decisiones de tratamiento compartidas
- Sientan las bases del autocuidado
- Al ser siempre el paciente quien lo rellena, no hay cambios en la perspectiva, como si ocurriría si cambiara el médico

Respuesta: A) No es correcto. Los PRO facilitan la relación médico-paciente, luego es una ventaja. B) Correcto. En realidad los PRO no tienen por qué alargar la consulta; el paciente los puede responder antes de entrar. C) No es correcto. El uso de PRO facilita la participación del paciente en la toma de decisiones, luego es una ventaja. D) No es correcto. Los PRO favorecen el autocuidado, luego es una ventaja. E) No es correcto. En los PRO, sólo hay un observador, el paciente, por lo que los datos son más reproducibles que con dos observadores, luego es una ventaja.

|                  |    |
|------------------|----|
| % correctas pre  | 69 |
| % correctas post | 71 |
| Mejoría          | 2  |

10. ¿Qué definición práctica de remisión se asocia a ausencia de progresión radiológica?

- Remisión ecográfica y booleana
- Presencia de sinovitis ecográfica pero no clínica
- DAS28-VSG  $< 2,8$
- Sinovitis residual
- Señal Power-Doppler en contacto con el hueso

Respuesta: A) Correcto. La remisión por ecografía y según criterios booleanos es la que más se ha asociado a ausencia de progresión radiológica. B) No es correcto. La presencia de sinovitis ecográfica se asocia a progresión. C) No es correcto. La definición de remisión del DAS28-VSG es  $< 2,6$ . D) No es correcto. La sinovitis residual es sinovitis ecográfica y se asocia a progresión. E) No es correcto. La señal PD en contacto o penetrando en el hueso tiene elevado riesgo de progresión.

|                 |    |
|-----------------|----|
| % correctas pre | 78 |
|-----------------|----|

|                         |    |
|-------------------------|----|
| <b>% correctas post</b> | 94 |
| <b>Mejoría</b>          | 16 |

## 11. Una vez alcanzada la remisión: ¿Qué dicen las guías internacionales?

- ACR: interrumpir todos los tratamientos a los 2 meses de conseguir la remisión
- ACR: no se debe reducir la dosis, sino suspender tratamientos, en función de la actividad
- EULAR: suspender primero el fármaco sintético y, por último, los glucocorticoides
- EULAR: comenzar reduciendo la dosis de los glucocorticoides
- EULAR: suspender primero el fármaco biológico

Respuesta: A) No es correcto. El ACR recomienda NO interrumpir todos los tratamientos para la AR. B) No es correcto. El ACR establece que, en remisión, se puede considerar la reducción de dosis de los tratamientos para la AR. C) No es correcto. EULAR recomienda empezar primero la reducción de corticoides y por último los FAME sintéticos. D) Es la correcta. EULAR recomienda comenzar a reducir dosis por los corticoides. E) No es correcto. EULAR recomienda primero reducir dosis de corticoides, después biológicos y después los FAME sintéticos.

|                         |    |
|-------------------------|----|
| <b>% correctas pre</b>  | 97 |
| <b>% correctas post</b> | 98 |
| <b>Mejoría</b>          | 1  |

## 12. Respecto a la sinovitis detectada por ecografía, señale la respuesta correcta:

- No es predictor de fallo a reducción de dosis
- Tiene más probabilidades de tener un brote
- Si hay remisión clínica, pierde su capacidad predictora de daño articular
- La muñeca y MCF incluidas en los índices son siempre de la mano no dominante
- Se asocia a mayor duración de la remisión clínica

Respuesta: A) No es correcto. La sinovitis detectada por ecografía predice el fallo tras reducción de dosis. B) Es correcto, los pacientes con sinovitis ecográfica están en una posición de mayor riesgo para tener un nuevo brote. C) No es correcto. La sinovitis detectada por ecografía predice progresión, independientemente de la clínica. D) No es correcto. Son las de la mano dominante las que están incluidas en todos los índices. E) No es correcto. La sinovitis detectada por ecografía se asocia a menor duración de la remisión tras reducción de dosis.

|                         |    |
|-------------------------|----|
| <b>% correctas pre</b>  | 70 |
| <b>% correctas post</b> | 86 |
| <b>Mejoría</b>          | 16 |

## 13. Señala la correcta en relación con el MBDA (Multi- Blomaker Disease Activity test)

- Ha sido validado en estudios clínicos de pacientes con AR precoz y establecida
- No se correlaciona con medidas clínicas de actividad, sólo con medidas ecográficas
- Está formado exclusivamente por PCR y VSG
- Está ampliamente validado y extendido en su uso
- La mejoría temprana en la puntuación del MBDA no se asocia a remisión clínica al año

Respuesta A) Es la correcta. B) No es correcto. Se ha demostrado que se correlaciona significativamente con las medidas clínicas de actividad. C) No es correcto. Está formado por PCR, amiloide A, IL-6, TNF-R1, Leptina, Resistina, MMP-1, MMP-3, YKL-40, VCAM-1, VEGF-A y EGF. D) No es correcto. El MBDA ha demostrado una moderada validez convergente con el DAS28-PCR y DAS28-VSG, pero correlaciones más débiles con SDAI, CDAI y RAPID. Son necesarios más estudios para valorar las características de su comportamiento. E) No es correcto. Una mejoría temprana en la puntuación del MBDA se asocia a remisión clínica a 1 año.

|                         |    |
|-------------------------|----|
| <b>% correctas pre</b>  | 82 |
| <b>% correctas post</b> | 80 |
| <b>Mejoría</b>          | -2 |

#### 14. Marque la respuesta correcta respecto a la calprotectina

- a. No se ha estudiado su utilidad en la AR todavía
- b. Es un predictor muy potente de recaída en pacientes en remisión / baja actividad con terapia anti-TNF
- c. Predice la respuesta a la reducción de dosis con anti-TNF
- d. No existe asociación entre los niveles de calprotectina y los índices de actividad
- e. Sus niveles no se asocian con la sinovitis subclínica ecográfica

Respuesta: A) No es correcto. Aunque se necesitan más trabajos de calprotectina en AR, sus posibles utilidades han sido estudiadas ampliamente. B) Es la respuesta correcta. C) No es correcto. En pacientes con baja actividad de la enfermedad, la calprotectina no tiene valor predictivo tras la disminución del tratamiento con anti TNF. D) No es correcto. Sí existe asociación entre los niveles del calprotectina y los índices de actividad. E) No es correcto. Los niveles de calprotectina sí se asocian con la sinovitis subclínica ecográfica.

|                         |    |
|-------------------------|----|
| <b>% correctas pre</b>  | 45 |
| <b>% correctas post</b> | 58 |
| <b>Mejoría</b>          | 13 |

#### 15. ¿Qué es la calculadora REDOSER?

- a. Es un nuevo proyecto SER de control de dosis de biológicos
- b. Es una calculadora para pacientes, para conocer su situación clínica
- c. Es una aplicación diseñada para ayudarle en la toma de decisiones relacionadas con la reducción de dosis de terapia biológica, para profesionales
- d. Es una herramienta que ayuda a calcular el precio de los tratamientos de los pacientes con AR
- e. Es una aplicación que permite ajustar la dosis de corticoides y biológicos, según los datos ecográficos

Respuesta: A) No es correcto. Es un proyecto SER finalizado para la valoración de la reducción de dosis. B) No es correcto. Es una herramienta para profesionales. C) Es la correcta, Redoser ayuda a la toma de decisiones en el ámbito profesional. D) No es correcto. Es una herramienta para la toma de decisiones de reducción de dosis, no para el cálculo de precios. E) No es correcto. No es para el ajuste de dosis, es para tomar la decisión si reducir o no.

|                         |     |
|-------------------------|-----|
| <b>% correctas pre</b>  | 94  |
| <b>% correctas post</b> | 100 |
| <b>Mejoría</b>          | 6   |

La proporción media de respuestas correctas en el primer ejercicio fue de 72%, subiendo al 78% tras la formación y tres meses.

## Preguntas que no alcanzaron un nivel suficiente ( $\geq 70\%$ correctas) de conocimiento. Porcentaje de respuestas correctas antes y después de los talleres y cambio ( $\Delta$ ).

| Pregunta                                                                                                                                                                    | % correctas |      | $\Delta$ |
|-----------------------------------------------------------------------------------------------------------------------------------------------------------------------------|-------------|------|----------|
|                                                                                                                                                                             | pre         | post |          |
| 2. ¿Señala la opción más acertada respecto a la remisión mantenida según EULAR?                                                                                             |             |      |          |
| a. Conseguir DAS 28-VSG $< 2,6$ durante 3 meses                                                                                                                             |             |      |          |
| b. Al menos 6 meses en remisión                                                                                                                                             |             |      |          |
| c. Conseguir datos de mínima actividad, sin tratamiento                                                                                                                     | 58          | 61   | 3        |
| d. Conseguir baja actividad sin necesidad de corticoides                                                                                                                    |             |      |          |
| e. NAT y NAD igual a 0, en dos visitas consecutivas                                                                                                                         |             |      |          |
| 6. ¿Se pueden intercambiar DAS28-PCR y DAS28-VSG, utilizando en uno la PCR y en otro la VSG?                                                                                |             |      |          |
| a. Sí, se pueden intercambiar, ya que para ambos la remisión está en 2,6                                                                                                    |             |      |          |
| b. No, en general el DAS28-PCR da menor puntuación que el DAS28-VSG                                                                                                         |             |      |          |
| c. No, dado que el punto de corte del DAS28-PCR es más alto que el DAS28-VSG                                                                                                | 40          | 41   | 1        |
| d. No, el DAS28-PCR sólo se puede intercambiar por el SDAI                                                                                                                  |             |      |          |
| e. Sí, el DAS28-VSG y el DAS28-PCR son intercambiables en situaciones de baja actividad de la enfermedad                                                                    |             |      |          |
| 7. Los criterios EULAR/ ACR de remisión de 2011, incluyen criterios booleanos y basados en índices. Señala cual es la “pareja” verdadera (tipo de criterio e ítem incluido) |             |      |          |
| a. Booleanos- EVA médico $\leq 1$                                                                                                                                           |             |      |          |
| b. Booleanos- VSG $\leq 10$                                                                                                                                                 | 49          | 60   | 11       |
| c. Basados en índice – DAS 28-VSG $< 2,8$                                                                                                                                   |             |      |          |
| d. Booleanos – EVA paciente $\leq 1$                                                                                                                                        |             |      |          |
| e. Basados en índice- CDAI $< 3,2$                                                                                                                                          |             |      |          |
| 8. ¿Cuál de las siguientes NO es una ventaja de usar un PRO para evaluar la remisión?                                                                                       |             |      |          |
| a. Permiten que se establezca una relación médico-paciente fluida                                                                                                           |             |      |          |
| b. Precisa de tiempos de consulta más largos                                                                                                                                |             |      |          |
| c. Facilitan la participación del paciente en decisiones de tratamiento compartidas                                                                                         | 69          | 71   | 2        |
| d. Sientan las bases del autocuidado                                                                                                                                        |             |      |          |
| e. Al ser siempre el paciente quien lo rellena, no hay cambios en la perspectiva, como si ocurriría si cambiara el médico                                                   |             |      |          |
| 13. Marque la respuesta correcta respecto a la calprotectina                                                                                                                |             |      |          |
| a. No se ha estudiado su utilización en la AR todavía                                                                                                                       |             |      |          |
| b. Es un predictor muy potente de recaída en pacientes en remisión / baja actividad con terapia anti-TNF                                                                    | 45          | 58   | 13       |
| c. Predice la respuesta a la reducción de dosis con anti-TNF                                                                                                                |             |      |          |
| d. No existe asociación entre los niveles de calprotectina y los índices de actividad                                                                                       |             |      |          |
| e. Sus niveles no se asocian con la sinovitis subclínica ecográfica                                                                                                         |             |      |          |

Las respuestas correctas son: 2b, 6b, 7d, 8b, 13b.

Abreviaturas: CDAI= Clinical disease activity index; DAS28-PCR= Disease Activity Score-28-proteína C reactiva; DAS28-VSG= Disease Activity Score-28-velocidad de sedimentación globular; EVA= escala visual analógica; PCR= proteína C reactiva; pre= resultados previos al taller; post= resultados posteriores al taller; SDAI= simple disease activity index; VSG= velocidad de sedimentación globular; PRO = Patient Reported Outcome

## Preguntas sobre la opinión / manejo de la remisión antes y después del taller

|                                                                                                                        | % respuestas |      | $\Delta$  |
|------------------------------------------------------------------------------------------------------------------------|--------------|------|-----------|
|                                                                                                                        | Pre          | Post |           |
| El concepto de remisión es para los reumatólogos                                                                       |              |      |           |
| Curación                                                                                                               | 4            | -    | -4        |
| Ausencia de síntomas                                                                                                   | 2            | 2    | 0         |
| Inflamación mínima o ausente                                                                                           | 11           | 11   | 0         |
| Ausencia de inflamación y de síntomas                                                                                  | 83           | 87   | 4         |
| El concepto de remisión debe incluir el resultado de...                                                                |              |      |           |
| Imagen                                                                                                                 | 91           | 93   | 2         |
| PROs                                                                                                                   | 95           | 98   | 3         |
| Seroconversión                                                                                                         | 14           | 29   | <b>15</b> |
| Biomarcadores                                                                                                          | 100          | 96   | -4        |
| En práctica clínica la remisión en AR se valora con                                                                    |              |      |           |
| DAS28                                                                                                                  | 93           | 89   | -4        |
| SDAI                                                                                                                   | 30           | 30   | 0         |
| CDAI                                                                                                                   | 22           | 38   | <b>16</b> |
| NAD                                                                                                                    | 89           | 93   | 4         |
| NAT                                                                                                                    | 93           | 95   | 2         |
| RFA                                                                                                                    | 93           | 93   | 0         |
| EVA médico                                                                                                             | 79           | 80   | 1         |
| EVA paciente                                                                                                           | 86           | 90   | 4         |
| RAPID-3                                                                                                                | 13           | 10   | -3        |
| Ecografía con presencia de señal Doppler                                                                               | 29           | 28   | -1        |
| Radiografía                                                                                                            | 42           | 39   | -3        |
| RM                                                                                                                     | 10           | 13   | 3         |
| El objetivo terapéutico en AR es la                                                                                    |              |      |           |
| Remisión                                                                                                               | 22           | 31   | 9         |
| Remisión o baja actividad dependiendo de los casos                                                                     | 78           | 69   | -9        |
| Baja actividad                                                                                                         | -            | -    | -         |
| Reducen la dosis de terapia biológica una vez alcanzado el objetivo                                                    |              |      |           |
| Siempre                                                                                                                | 8            | 5    | -3        |
| Habitualmente                                                                                                          | 55           | 60   | 4         |
| Solo en determinados perfiles de pacientes                                                                             | 35           | 35   | 0         |
| Nunca                                                                                                                  | 1            | -    | -1        |
| Tiempo que mantienen al paciente en objetivo terapéutico antes de disminuir la dosis de terapia biológica              |              |      |           |
| Nunca se lo plantean                                                                                                   | -            | -    | -         |
| 12 o más meses                                                                                                         | 37           | 40   | 3         |
| Entre 6 y 12 meses                                                                                                     | 63           | 58   | -5        |
| Menos de 6 meses                                                                                                       | -            | 2    | 2         |
| Valor otorgado en un paciente en objetivo terapéutico a la hora de considerar reducción de dosis de terapia biológica* |              |      |           |
| Corticoterapia a dosis bajas                                                                                           | 66           | 80   | <b>14</b> |
| Un EVA = 0, independientemente de otros parámetros                                                                     | 52           | 58   | 6         |
| Ecografía con señal Doppler                                                                                            | 76           | 78   | 2         |
| Factores de mal pronóstico                                                                                             | 85           | 84   | -1        |
| Sin FAME asociado                                                                                                      | 68           | 64   | -4        |
| Fallo a varios biológicos previos                                                                                      | 86           | 81   | -5        |
| Actividad alta al inicio del biológico                                                                                 | 54           | 71   | <b>17</b> |
| Duración de la enfermedad < 1-2 años                                                                                   | 61           | 73   | <b>12</b> |
| Edad $\geq$ 70 años                                                                                                    | 53           | 54   | 1         |
| Los niveles de fármaco se usan para tomar la decisión de reducir dosis de biológico                                    |              |      |           |
| Habitualmente                                                                                                          | 7            | 7    | 0         |
| Algunas veces                                                                                                          | 49           | 53   | 4         |

|                                                                          | %<br>respuestas |          | $\Delta$   |
|--------------------------------------------------------------------------|-----------------|----------|------------|
|                                                                          | Pre             | Post     |            |
| Nunca, porque no creo en ellos<br>Nunca, porque no dispongo de ellos     | 15<br>29        | 11<br>29 | -4<br>0    |
| La ecografía se usa para tomar la decisión de reducir dosis de biológico |                 |          |            |
| Habitualmente                                                            | 18              | 33       | <b>15</b>  |
| Algunas veces                                                            | 72              | 62       | -10        |
| Nunca, porque no creo en ella                                            | 6               | 2        | 4          |
| Nunca, porque no dispongo de ecógrafo                                    | 4               | 4        | 0          |
| Conocen la herramienta RedoSER                                           | 46              | 89       | <b>43</b>  |
| Utilizan RedoSER para la decisión de la reducción de dosis               | 47              | 78       | <b>31</b>  |
| Motivaciones para reducir la dosis de la terapia biológica <sup>†</sup>  |                 |          |            |
| Mejorar la seguridad                                                     | 66              | 91       | <b>25</b>  |
| La posibilidad de ahorrar                                                | 52              | 58       | 6          |
| Se puede recuperar el objetivo terapéutico subiendo dosis                | 76              | 77       | 1          |
| Que así lo dicte el protocolo de mi centro / CCAA                        | 85              | 59       | <b>-26</b> |
| Que me lo solicite el paciente                                           | 68              | 31       | <b>-37</b> |
| Utilizar la mínima dosis eficaz                                          | 86              | 60       | <b>-26</b> |

\* Las respuestas a esta pregunta se daban en una escala Likert entre 1 y 5, donde 1="no le doy valor" y 5= "le doy mucho valor". El contenido de las columnas pre-post es el resultado de sumar los % de respuestas con puntuación 4 y 5.

† La respuesta se daba en una escala Likert entre 1 y 5, donde 1= "Totalmente en contra" y 5= "totalmente de acuerdo". El contenido de las columnas pre-post es el resultado de sumar los % de respuestas con puntuación 4 y 5.

Abreviaturas: PROs= Patient Reported Outcomes; DAS28= Disease Activity Score; SDAI= Simple disease activity index; CDAI= Clinical disease activity index; NAD= número de articulaciones dolorosas; NAT= número de articulaciones tumefactas; RFA= reactantes de fase aguda; EVA= escala visual analógica; RAPID= routine assessment of patient index data; RM= resonancia magnética
